# Supplementary material
Source: PubMed Central journal article supplement (PMC3536418)
Supplement: JVI.01804-12_zjv999097056so1.pdf [file JVI.01804-12_zjv999097056so1.pdf]

| Gene ID | TRIM   | Reference Seq | Accession No. | Source                              | Structure                     | Subgroup |
|---------|--------|---------------|---------------|-------------------------------------|-------------------------------|----------|
| 11043   | TRIM1  | NM_052817     | BC017707      | OB:MHS1010-58431                    | R BB1 BB2 CC COS FN3 SPRY     | 1        |
| 23321   | TRIM2  | NM_015271     | BC011052      | OB:MHS1010-7429489                  | R BB2 CC FIL NHL              | 7        |
| 10612   | TRIM3  | NM_033278     | AF045239      | Reymond <i>et. al.</i> 2001*        | R BB2 CC FIL NHL              | 7        |
| 89122   | TRIM4  | NM_033091     | AF220024      | Reymond <i>et. al.</i> 2001*        | R BB2 CC SPRY                 | 4        |
| 85363   | TRIM5  | NM_033034     | BC021258      | Stremlau <i>et. al.</i> 2004        | R BB2 CC SPRY                 | 4        |
| 117854  | TRIM6  | NM_058166     | BC065575      | Reymond <i>et. al.</i> 2001*        | R BB2 CC PRY SPRY             | 4        |
| 81603   | TRIM8  | NM_030912     | BC021925      | Reymond <i>et. al.</i> 2001*        | R BB1 BB2 CC                  | 5        |
| 114088  | TRIM9  | NM_015163     | AF220037      | Reymond <i>et. al.</i> 2001*        | R BB1 BB2 CC COS FN3 SPRY     | 1        |
| 81559   | TRIM11 | NM_145214     | BC069227      | OB:MHS1011-98054040**               | R BB2 CC PRY SPRY             | 4        |
| 10206   | TRIM13 | NM_005798     | BI905976      | OB:EHS1001-7517987                  | R BB2 CC TM                   | 11       |
| 9830    | TRIM14 | NM_014788     | AF220130      | Reymond <i>et. al.</i> 2001*        | BB2 CC PRY SPRY               | UC       |
| 89870   | TRIM15 | NM_033229     | BC038585      | OB:MHS1010-7508596                  | R BB2 CC PRY SPRY             | 4        |
| 10626   | TRIM16 | NM_006470     | BC015674      | Gift from Sébastien Nisole          | BB1 BB2 CC PRY SPRY           | UC       |
| 51127   | TRIM17 | NM_001024940  | BC033788      | Gift from Sébastien Nisole          | R BB2 CC PRY SPRY             | 4        |
| 4281    | TRIM18 | NM_033291     | BC053626      | OB: MHS1010-9205608                 | R BB1 BB2 CC COS FN3 PRY SPRY | 1        |
| 5371    | TRIM19 | NM_033249     | AF230411      | Reymond <i>et. al.</i> 2001* (PML3) | R BB1 BB2 CC                  | 5        |
| 4210    | TRIM20 | NM_000243     | AF018080      | Reymond <i>et. al.</i> 2001*        | PYR BB2 CC PRY SPRY           | UC       |
| 6737    | TRIM21 | NM_003141     | BC010861      | OB:MHS1010-73808                    | R BB2 CC PRY SPRY             | 4        |
| 10346   | TRIM22 | NM_006074     | BC035582      | cDNA                                | R BB2 CC SPRY                 | 4        |
| 373     | TRIM23 | NM_006074     | BC035582      | Reymond <i>et. al.</i> 2001*        | R BB1 BB2 CC ARF              | 9        |
| 7706    | TRIM25 | NM_005082     | BC016924      | cDNA                                | R CC PRY SPRY                 | 4        |
| 7726    | TRIM26 | NM_003449     | BC032297      | OB:MHS1010-7507981                  | R BB2 CC PRY SPRY             | 4        |
| 5987    | TRIM27 | NM_009054     | BC013580      | OB:MHS1010-73801                    | R BB2 CC PRY SPRY             | 4        |
| 10155   | TRIM28 | NM_005762     | BC052986      | OB:MHS1010-9205415                  | R BB1 BB2 CC PHD BROMO        | 6        |
| 23650   | TRIM29 | NM_012101     | AF230388      | Reymond <i>et. al.</i> 2001*        | BB2 CC                        | UC       |
| 11074   | TRIM31 | NM_007028     | BC017017      | OB:MHS1010-74233                    | R BB2 CC                      | 5        |
| 22954   | TRIM32 | NM_012210     | BC003154      | Reymond <i>et. al.</i> 2001*        | R BB2 CC NHL                  | 7        |
| 53840   | TRIM34 | NM_021616     | BC140722      | cDNA                                | R BB2 CC SPRY                 | 4        |
| 23087   | TRIM35 | NM_015066     | BC018337      | OB:MHS1010-73500                    | R BB2 CC PRY SPRY             | 4        |
| 4591    | TRIM37 | NM_001005207  | BC036012      | Gift from Sébastien Nisole          | R BB2 CC MATH                 | 8        |
| 10475   | TRIM38 | NM_006355     | BC026930      | OB:MHS1010-7429568                  | R BB2 CC PRY SPRY             | 4        |
| 56658   | TRIM39 | NM_021253     | BC034985      | OB:MHS1010-7295937**                | R BB2 CC PRY SPRY             | 4        |
| 135644  | TRIM40 | NM_138700     | BC060785      | OB:MHS1010-9204128 **               | R BB2 CC                      | 5        |
| 90933   | TRIM41 | NM_033549     | BC018765      | OB:MHS1011-76931**                  | R BB2 CC PRY SPRY             | 4        |
| 129868  | TRIM43 | NM_138800     | BC015353      | OB:MHS1010-74174                    | R BB2 CC SPRY                 | 4        |
| 54765   | TRIM44 | NM_017583     | BC013166      | OB:MHS1010-58247                    | BB2 CC                        | UC       |
| 609318  | TRIM45 | NM_025188     | BC034943      | OB:MHS1010-7295468**                | R BB1 BB2 CC FIL              | 10       |
| 80128   | TRIM46 | NM_025058     | BC069416      | OB:MHS1768-9143936**                | R BB2 CC COS FN3 SPRY         | 1        |
| 91107   | TRIM47 | NM_033452     | BC017304      | OB:MHS1011-76759**                  | R BB2 CC PRY                  | 4        |
| 84767   | TRIM51 | NM_032681     | BC005014      | OB:MHS1011-60710**                  | R BB2                         | UC       |
| 84851   | TRIM52 | NM_032765     | BC007372      | Gift from Sébastien Nisole          | R BB                          | 5        |
| 55223   | TRIM62 | NM_018207     | BC012152      | OB:MHS1011-75791**                  | R BB2 CC PRY SPRY             | 4        |
| 55128   | TRIM68 | NM_018073     | BC075058      | Gift from Sébastien Nisole          | R BB2 CC PRY SPRY             | 4        |
| 574288  | Rh5    | NM_001032910  | AY523632      | Stremlau <i>et. al.</i> 2004        | R BB2 CC SPRY                 | 4        |

**Table S1** Details of TRIM proteins included in the study. All TRIM expression constructs obtained from Reymond et al 2001, Sebastian Nisole and cDNA were in pcDNA3. The cDNA was from mix of RNA samples obtained from PRR agonist-stimulated THP-1, PBMC derived macrophages and dendritic cells. Constructs from Open Biosystems (OB: Catalog number) were in or cloned into pCMVSPORT6 (\*\*). The subgroup column denotes the assigned class [1-11 or unclassified (UC)] for each TRIM based on classification carried out by Short and Cox 2003. Key: Rh, *Macaca mulatta*; R, Really interesting new gene domain; BB, Bbox 1 and 2; PRY/SPRY, SPIa/Ryanodine domain; BROMO, Bromodomain; CC, Predicted Coiled Coil domain; COS, C-terminal subgroup one signature; FN3, Fibronectin III like domain; FIL, Filamin-type immunoglobulin domain; MATH, Meprin and TRAF homology domain; NHL, NHL repeat; PHD, Plant homeodomain; TM, Transmembrane domain; PYR, pyrin; ARF, ADP ribosylation factor like.

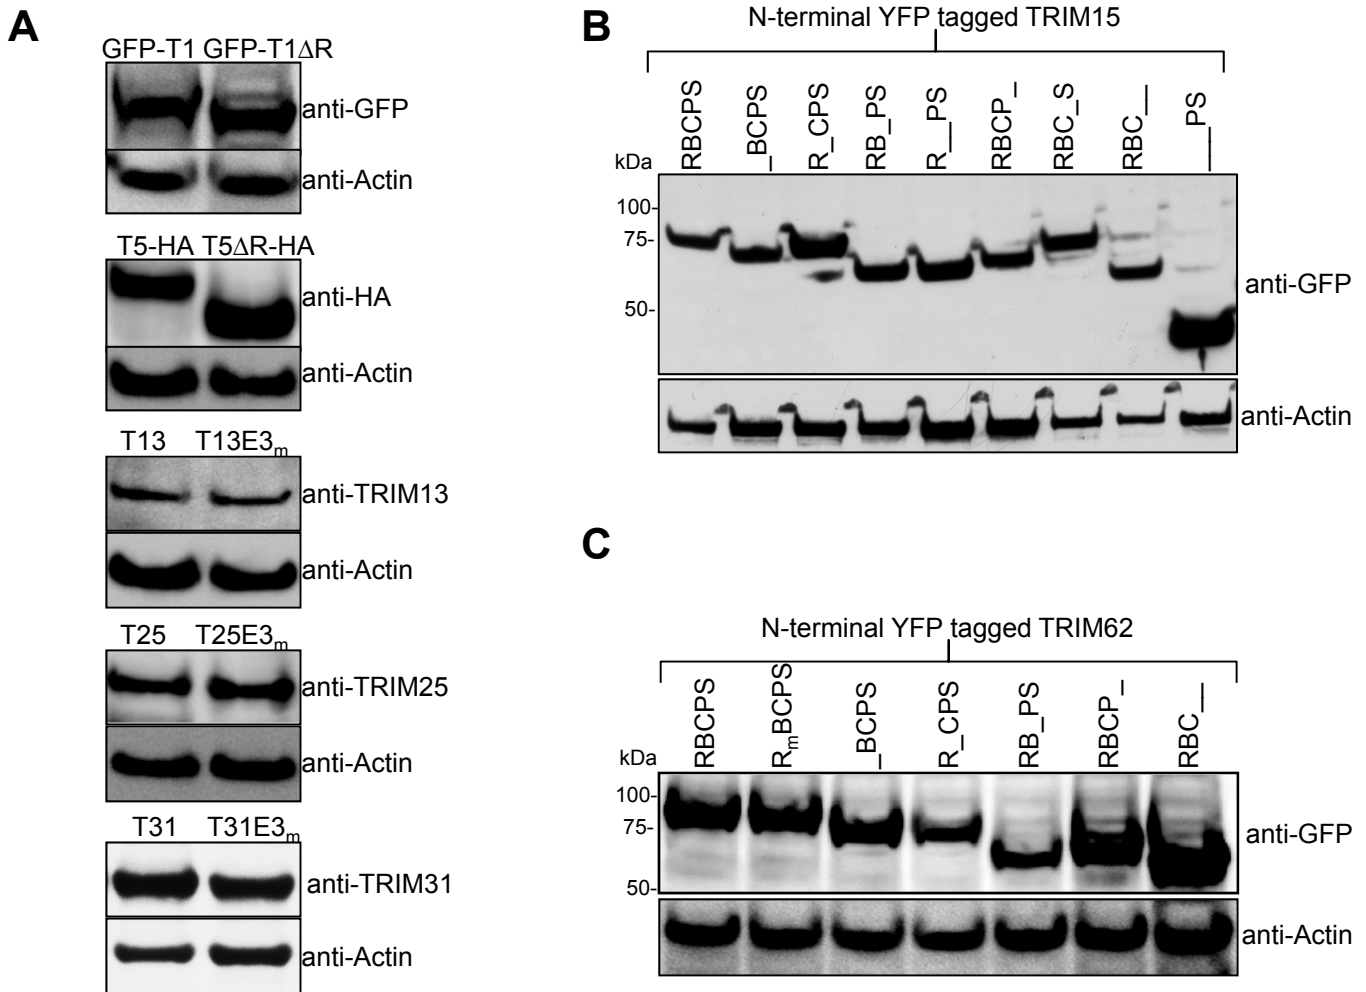

**FIG S1** Expression analysis of TRIM proteins and their derivatives. (A) Western blot analysis of HEK293 cell lysates expressing indicated tagged or untagged TRIM proteins and their RING domain deleted ( $\Delta$  R) or E3 mutant (E3<sub>m</sub>) versions 24 h post transfection with 50 ng of TRIM expression constructs using specified antibodies. Western blot analysis of HEK293 cell lysates expressing N-terminal YFP tagged versions of TRIM15 (B) and TRIM62 (C), 24 h post transfection with 50 ng of TRIM expression constructs using specified antibodies. R, B, C, P and S represent the RING, B-Box, Coiled coil, PRY and SPRY domains. The E3 ligase inactive mutant (C11A/C14A) is denoted as R<sub>m</sub>. Actin was used as loading control.



## Supplementary References

1. **Reymond, A., G. Meroni, A. Fantozzi, G. Merla, S. Cairo, L. Luzi, D. Riganelli, E. Zanaria, S. Messali, S. Cainarca, A. Guffanti, S. Minucci, P. G. Pelicci, and A. Ballabio.** 2001. The tripartite motif family identifies cell compartments. *Embo J* **20**:2140-2151.
2. **Short, K. M., and T. C. Cox.** 2006. Subclassification of the RBCC/TRIM superfamily reveals a novel motif necessary for microtubule binding. *J Biol Chem* **281**:8970-8980.
3. **Stremlau, M., C. M. Owens, M. J. Perron, M. Kiessling, P. Autissier, and J. Sodroski.** 2004. The cytoplasmic body component TRIM5alpha restricts HIV-1 infection in Old World monkeys. *Nature* **427**:848-853.
